# Supplementary material
Source: publisher figshare collection journal article supplement (https://karger.figshare.com/ndownloader/files/30481725)
Supplement: Supplementary file 1 [file 30481725]

**Supplemental Table 1. Seasonal variation in incidence rates of total stroke according to age and sex: Shiga Stroke Registry 2011-2013**

|  | Age- and sex-adjusted incidence rate,  per 100,000 person-years  (95% confidence interval) | | | P value  (versus summer) |
| --- | --- | --- | --- | --- |
| Male, Age <70 years |  |  |  |  |
| Spring | 109 | (99 to 121) | | 0.444 |
| Summer | 103 | (93 to 114) | | Reference |
| Autumn | 115 | (104 to 127) | | 0.138 |
| Winter | 138 | (126 to 151) | | <0.001 |
| Male, Age ≥70 years |  |  | |  |
| Spring | 732 | (671 to 799) | | 0.016 |
| Summer | 625 | (568 to 687) | | Reference |
| Autumn | 659 | (601 to 723) | | 0.422 |
| Winter | 807 | (742 to 878) | | <0.001 |
| Female, Age <70 years |  |  | |  |
| Spring | 57 | (50 to 66) | | 0.414 |
| Summer | 53 | (46 to 61) | | Reference |
| Autumn | 59 | (51 to 68) | | 0.283 |
| Winter | 62 | (54 to 71) | | 0.124 |
| Female, Age ≥70 years |  |  | |  |
| Spring | 659 | (610 to 712) | | <0.001 |
| Summer | 515 | (471 to 562) | | Reference |
| Autumn | 559 | (514 to 609) | | 0.184 |
| Winter | 698 | (646 to 753) | | <0.001 |
